# Supplementary material for: Deciphering Pleiotropic Signatures of Regulatory SNPs in Zea mays L. Using Multi-Omics Data and Machine Learning Algorithms
Source: Int J Mol Sci. 2022 May 4;23(9):5121. doi: 10.3390/ijms23095121 (PMC9100765; doi:10.3390/ijms23095121)
Supplement: Supplementary file 1 [file ijms-23-05121-s001.zip › SupplementaryFileS1.xlsx]

## Sheet: Tabelle1
Cluster_id	rSNP (chr:position)	Gene
Cluster_1	3:135629079	Zm00001eb137870
	3:135629096	Zm00001eb137870
	3:135629108	Zm00001eb137870
	3:135629111	Zm00001eb137870
	3:135629113	Zm00001eb137870
	3:214190696	Zm00001eb156700
	4:173634017	Zm00001eb190550
	4:173634018	Zm00001eb190550
	7:178294426	Zm00001eb328980
	8:132993153	Zm00001eb354560
	8:167875869	Zm00001eb364380
	8:173022077	Zm00001eb366710
	8:19217709	Zm00001eb337030
	9:145456555	Zm00001eb397560
	9:158841703	Zm00001eb403000
Cluster_2	10:96026804	Zm00001eb418690
	3:66473706	Zm00001eb131510
	4:165029339	Zm00001eb188340
	4:165029384	Zm00001eb188340
	5:168606251	Zm00001eb241990
	5:168606253	Zm00001eb241990
	6:158440908	Zm00001eb288200
	6:7271218	Zm00001eb260320
	9:5148603	Zm00001eb372200
Cluster_3	10:135458898	Zm00001eb427410
	2:32839725	Zm00001eb078130
	2:66222093	Zm00001eb084930
	2:7083414	Zm00001eb069210
	2:7083538	Zm00001eb069210
	5:54514218	Zm00001eb226230
	5:55917907	Zm00001eb226490
Cluster_4	10:126878715	Zm00001eb424640
	1:254194570	Zm00001eb049750
	1:282729140	Zm00001eb057150
	1:282729215	Zm00001eb057150
	2:5076931	Zm00001eb068110
	3:147694998	Zm00001eb140090
Cluster_5	3:224353639	Zm00001eb159830
	3:224353656	Zm00001eb159830
	3:224353667	Zm00001eb159830
	4:172267675	Zm00001eb190350
	6:115776867	Zm00001eb277700
	8:87596676	Zm00001eb346400
Cluster_6	1:282729212	Zm00001eb057150
	8:64323633	Zm00001eb342540
	8:67401457	Zm00001eb343100
	8:67401504	Zm00001eb343100
	8:67401647	Zm00001eb343100
Cluster_7	1:244446965	Zm00001eb047590
	1:294933036	Zm00001eb060810
	5:76811467	Zm00001eb231310
Cluster_8	1:300702547	Zm00001eb062790
	2:6700413	Zm00001eb069040
	3:39235199	Zm00001eb128150
Cluster_9	5:5943195	Zm00001eb213840
	8:107633953	Zm00001eb349520
Cluster_10	1:173453015	Zm00001eb031090
	2:26017215	Zm00001eb076110
Cluster_11	2:2890752	Zm00001eb066840
	5:176865814	Zm00001eb243850
